# Supplementary material
Source: Springer Nature journal article supplement (https://www.springermedizin.de/resource/supplementary/12931_2011_1135_MOESM1_ESM.pdf/9425412)

MFLCs

ELCs

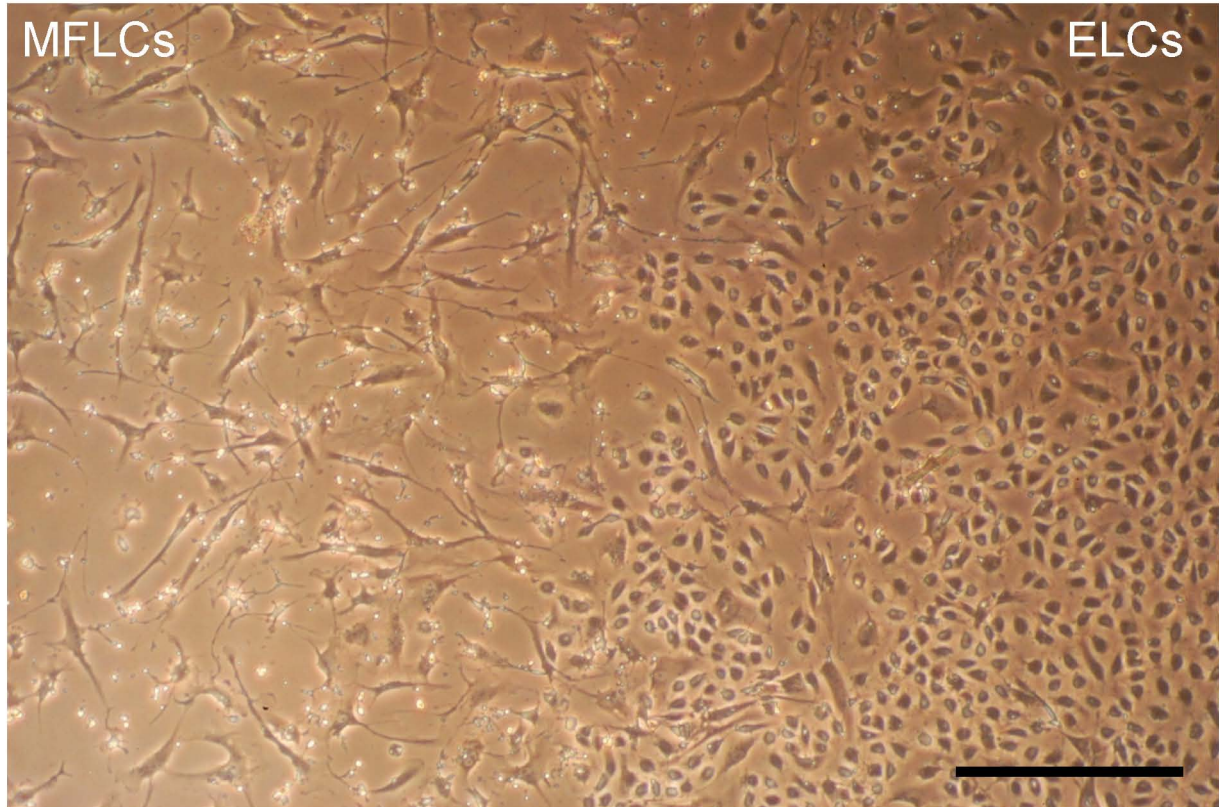

Supplement: MOESM1 [file 9425412]
